# Supplementary material for: At the Edge of Consciousness: Turkish Dentists’ Perspectives on Sedation
Source: Research Square preprint supplement (doi:10.21203/rs.3.rs-7506312/v1), 2025-11-10
Supplement: Supplementary file 1 [file 536586f664a28b7e1b286386.docx]

**SURVEY INSTRUMENT: DENTISTS’ PERSPECTIVES ON SEDATION**

Dear Dentist,

The purpose of this survey is to evaluate dentists’ awareness of sedation in dental practice. In recent years, the use of “sedation in dentistry” has increased, and your participation will help us assess the level of awareness on this topic.

This study has been prepared as part of a clinical research project. The survey is not an examination. Participation is voluntary, and all information obtained will remain confidential and used only for research purposes. You may choose not to participate or may withdraw at any point without any consequences.

Please indicate your decision regarding participation:

- I agree to complete the questionnaire and allow my data to be used in this study.
- I do not agree to complete the questionnaire and do not allow my data to be used in this study.

**Q1. What is your gender?**

☐ Male

☐ Female

**Q2. How many years have you been practicing dentistry?**

☐ I am a student

☐ < 5 years

☐ 5–10 years

☐ 10–20 years

☐ > 20 years

**Q3. What is your area of specialization?**

☐ I am a student

☐ I have no specialty (general dentist)

☐ Oral and Maxillofacial Surgery

☐ Endodontics

☐ Pedodontics (Pediatric Dentistry)

☐ Periodontology

☐ Prosthodontics

☐ Restorative Dentistry

☐ Oral Diagnosis and Radiology

**Q4. Have you ever performed a dental procedure under sedation?**

☐ Yes

☐ No

**Q5. Were you satisfied with the procedure you performed under sedation?**

☐ Yes

☐ No

**Q6. If you were satisfied, what was the reason?**

☐ Calm patient eased work

☐ No time pressure improved quality

☐ Patient would not remember the procedure

☐ Positive patient feedback

☐ Other

**Q7. If you were not satisfied, what was the reason?**

☐ Considered it risky / felt uneasy

☐ Patient not sedated enough → interfered with treatment

☐ Patient too deeply sedated → interfered with treatment

☐ Patient experienced pain

☐ Negative patient feedback

☐ Sedation-related complications (e.g., respiratory arrest, aspiration, vomiting)

☐ Other

**Q8. For what reasons do you prefer sedation?**

☐ Dental anxiety

☐ Gag reflex

☐ Procedure complexity/duration

☐ Patient request

☐ To increase procedural comfort

☐ To increase patient comfort

☐ To induce amnesia

☐ To improve patient compliance

☐ Other

**Q9. For what reasons do you not prefer sedation?**

☐ Considered unnecessary

☐ Considered risky

☐ Additional cost

☐ Lack of resources or facilities

☐ Organizational difficulty (e.g., anesthesia team, pre-op fasting, post-op recovery)

☐ Not comfortable for the patient

☐ Uncomfortable and time-consuming to perform

☐ Other

**Q10. How would you approach a patient with dental fear?**

☐ I try to reassure the patient

☐ I recommend sedation

☐ I try to convince the patient that sedation is necessary

☐ My approach does not change

☐ Other

**Q11. How would you approach a patient requesting sedation?**

☐ I accept and provide sedation information

☐ I try to convince that sedation is not necessary

☐ I inform the patient about risks

☐ I inform the patient about cost

☐ Other

**Q12. Preferred frequency of sedation use in dentistry?**

☐ For every patient

☐ For as many patients as possible

☐ It should be performed when indicated

☐ As infrequently as possible

☐ Never performed

☐ I don’t know

**Q13. In your opinion, which is more risky?**

☐ Sedation

☐ General anesthesia

☐ Local anesthesia

**Q14. With which method do you feel more comfortable working?**

☐ Sedation

☐ General anesthesia

☐ Local anesthesia

**Q15. Before sedation, the patient…**

☐ May eat

☐ Should not eat

**Q16. In which situations do you consider sedation to be unsuccessful?**

☐ When the patient opens their eyes

☐ When the patient speaks

☐ When the patient moves their extremities

☐ When the patient responds to verbal commands

☐ When the patient feels pain

☐ When the patient vomits

☐ When the patient awakens late
